# Supplementary material for: The Relationships between Caregiver Burden, Physical Frailty, Race, Behavioral and Psychological Symptoms (BPSD), and Other Associated Variables: An Exploratory Study
Source: MDPI journal article supplement (doi:10.3390/medicina60030426), 2024-03-01
Supplement: s1 [file s1]

**Table S1.** Linear Regression Analyses for Path Design for Patients Diagnosed with Alzheimer’s Disease.

| Dependent Variables |                  |      |                   |      |                    |      |
|---------------------|------------------|------|-------------------|------|--------------------|------|
|                     | CBI <sup>#</sup> |      | NPI <sup>##</sup> |      | SSF <sup>###</sup> |      |
|                     | Adjusted Model   |      | Adjusted Model    |      | Adjusted Model     |      |
| Variables           | $\beta$          | p    | $\beta$           | p    | $\beta$            | p    |
| Age $\geq$ 80       | .12              | .18  | .10               | .23  | .11                | .19  |
| Female              | -.00             | .50  | -.09              | .25  | .23                | .028 |
| White               | .32              | .007 | .08               | .28  | -.27               | .014 |
| MMSE $\leq$ 17      | .12              | .16  | .02               | .44  | ----               | ---- |
| ADL $>$ 7           | .02              | .43  | .03               | .09  | ----               | ---- |
| NPI                 | .37              | .002 | ----              | ---- | ----               | ---- |
| CIRSG $>$ 7         | -.01             | .46  | .02               | .45  | ----               | ---- |
| SSF                 | .12              | .21  | .33               | .01  | ----               | ---- |

Notes:  
N=66  
p-values are 1-tailed.  
<sup>#</sup>R<sup>2</sup>adj=.19, F(8,57)=2.94, p=.008  
<sup>##</sup>R<sup>2</sup>adj=-.00, F(7,58)=.96 p=.47  
<sup>###</sup>R<sup>2</sup>adj=.13, F(3,62)=4.21, p=.009.

Significant indirect effect found for SSF on CBI mediated through NPI:  
.33 x.37=.12; Sobel Test, z-score= 1.84, p=.03 (1-tailed).

Abbreviations: SFF= Subsyndromal/Syndromal Frailty; CBI=Caregiver Burden Interview; MMSE=Mini-Mental State Examination; ADL=Activities of Daily Living; NPI= Neuropsychiatric Inventory; CIRSG= Cumulative Illness Rating Scale Geriatrics
